# Supplementary material for: Poly(styrene sulfonate) layered double hydroxide nanocomposites. Stability and subsequent structural transformation with changes in temperatureElectronic supplementary information (ESI) available additional: XRD patterns and EDX analyses. See http://www.rsc.org/suppdata/jm/b2/b208551h/
Source: Royal Society of Chemistry journal article supplement (doi:10.1039/b208551h), 2003-01-13
Supplement: b208551h.pdf [file b208551h.pdf]

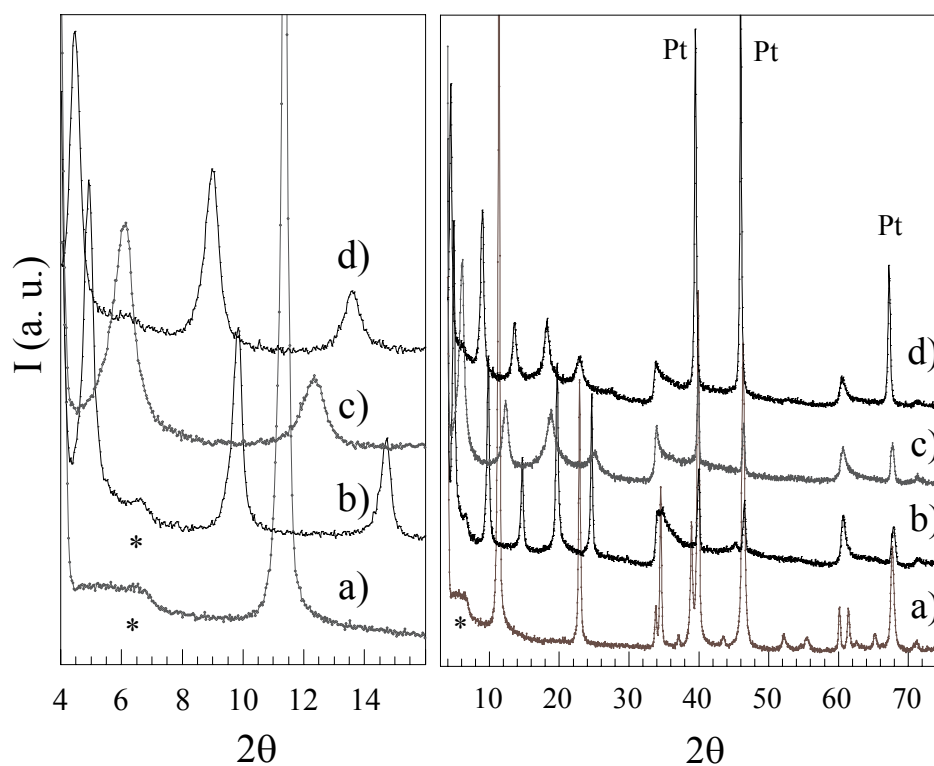

**Fig. i** XRD patterns of a) Cl-[Zn<sub>2</sub>Al], VBS-[Zn<sub>2</sub>Al] at b) room temperature and c) after 200°C and d) PSS-[Zn<sub>2</sub>Al] LDH nanocomposites. The asterisk represents the PSD response. On the left, the portion at low angle is enlarged for clarity.

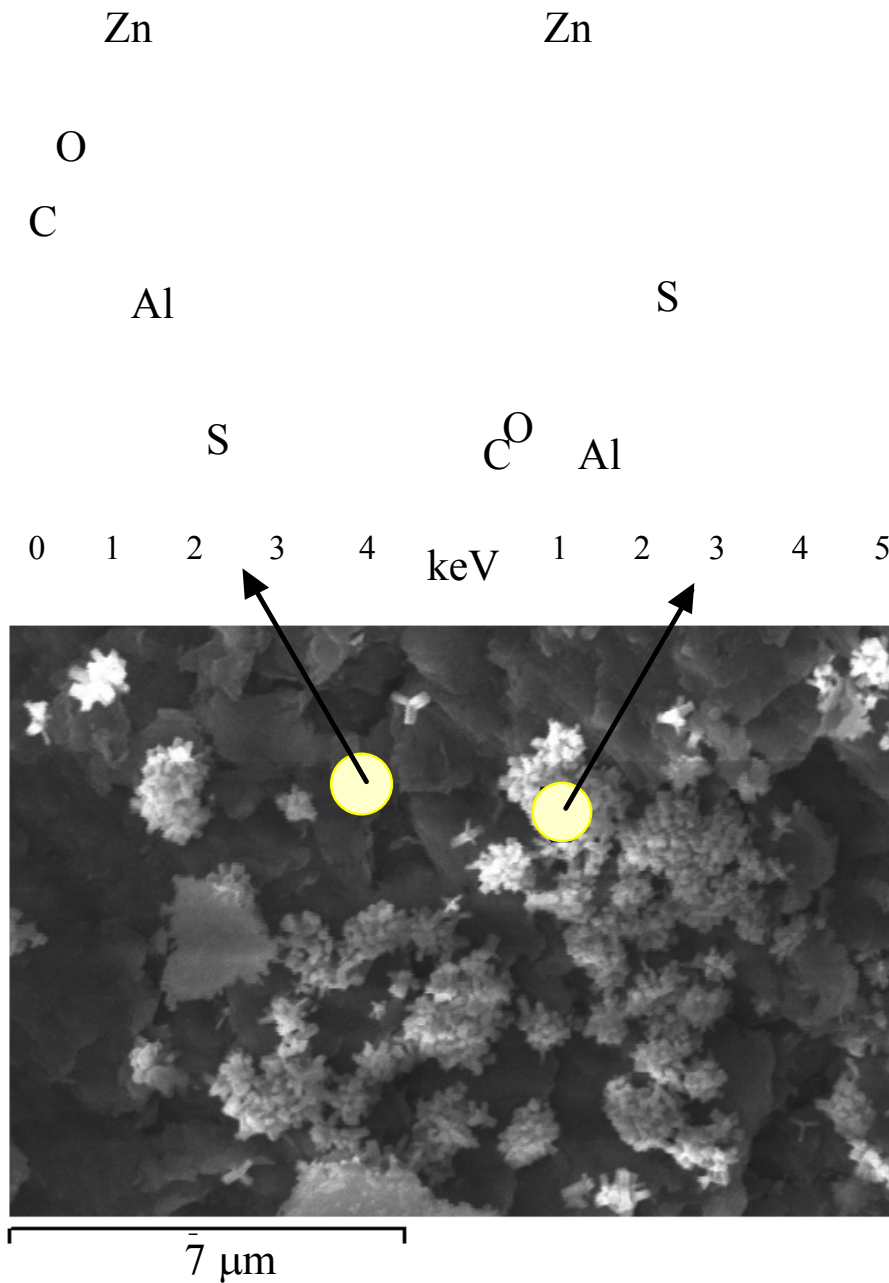

**Fig. ii** EDX analyses for VBS-[Zn<sub>2</sub>Al] phase after treatment at 600°C under N<sub>2</sub> atmosphere.

The little crystallites shaped in star gathered together are mostly composed of the elements Zn and S, whereas the matrix (in dark) presents the elements Al, O and C in addition.
